# Supplementary material for: Discovery of Conformationally Constrained ALK2 Inhibitors
Source: PubMed Central journal article supplement — J Med Chem. 2024 Mar 18;67(6):4707–25. doi: 10.1021/acs.jmedchem.3c02308 (PMC10983009; doi:10.1021/acs.jmedchem.3c02308), 2024-03-18

## Supporting Information

# Discovery of Conformationally Constrained ALK2 Inhibitors

*Héctor González-Álvarez,<sup>†,§</sup> Deeba Ensan,<sup>†,§</sup> Tao Xin,<sup>†</sup> Jong Fu Wong,<sup>‡</sup> Carlos A. Zepeda-Velázquez,<sup>†</sup> Julien Cros,<sup>ψ</sup> Laurent Hoffer,<sup>†</sup> Taira Kiyota,<sup>†</sup> Brian J. Wilson,<sup>†</sup> Ahmed Aman,<sup>†,£</sup> Owen Roberts,<sup>¥</sup> Methvin B. Isaac,<sup>†</sup> Alex N. Bullock,<sup>ψ</sup> David Smil,<sup>\*,†</sup> Rima Al-awar<sup>\*,†,§,#</sup>*

<sup>†</sup> Drug Discovery Program, Ontario Institute for Cancer Research, 661 University Avenue, MaRS Centre, West Tower, Toronto, Ontario M5G 0A3, Canada

<sup>§</sup> Department of Pharmacology and Toxicology, University of Toronto, Medical Sciences Building, Room 4207, 1 King's College Circle, Toronto, Ontario M5S 1A8, Canada

<sup>‡</sup> Structural Genomics Consortium, Nuffield Department of Medicine, University of Oxford, Old Road Campus, Roosevelt Drive, Oxford OX3 7DQ, United Kingdom

<sup>ψ</sup> Centre for Medicines Discovery, Nuffield Department of Medicine, University of Oxford, Old Road Campus Research Building, Roosevelt Drive, Oxford OX3 7FZ, United Kingdom

<sup>£</sup> Leslie Dan Faculty of Pharmacy, University of Toronto, 144 College Street, Toronto, Ontario M5S 3M2, Canada

<sup>¥</sup> M4K Pharma, 101 College Street, MaRS Centre, South Tower, Toronto, Ontario M5G 1L7, Canada

<sup>#</sup> Department of Chemistry, University of Toronto, 80 St. George St, Toronto, Ontario M5S 3H6 Canada.

Email: david.smil@oicr.on.ca

## Contents of SI

|                                                       |     |
|-------------------------------------------------------|-----|
| 1. Supplementary Tables.....                          | S2  |
| 2. <sup>1</sup> H NMR Spectra of Final Compounds..... | S15 |
| 3. HPLC Traces of Final Compounds.....                | S22 |

## 1. SUPPLEMENTARY TABLES

**Table S1. Kinase (422) Selectivity Panel**

|                        | <b>% Enzyme Activity (relative to DMSO control) @ 1<br/>μM compound and 10 μM ATP</b> |
|------------------------|---------------------------------------------------------------------------------------|
| <b>Kinase</b>          | <b>M4K2304</b>                                                                        |
| <b>AAK1(h)</b>         | 95                                                                                    |
| <b>Abl(h)</b>          | 73                                                                                    |
| <b>Abl(m)</b>          | 79                                                                                    |
| <b>Abl (H396P) (h)</b> | 88                                                                                    |
| <b>Abl (M351T)(h)</b>  | 71                                                                                    |
| <b>Abl (Q252H) (h)</b> | 74                                                                                    |
| <b>Abl(T315I)(h)</b>   | 109                                                                                   |
| <b>Abl(Y253F)(h)</b>   | 77                                                                                    |
| <b>ACK1(h)</b>         | 77                                                                                    |
| <b>ACTR2(h)</b>        | 54                                                                                    |
| <b>ALK(h)</b>          | 98                                                                                    |
| <b>ALK1(h)</b>         | 3                                                                                     |
| <b>ALK2(h)</b>         | 0                                                                                     |
| <b>ALK4(h)</b>         | 32                                                                                    |
| <b>ALK6(h)</b>         | 11                                                                                    |
| <b>Arg(h)</b>          | 96                                                                                    |
| <b>AMPKα1(h)</b>       | 96                                                                                    |
| <b>AMPKα2(h)</b>       | 114                                                                                   |
| <b>A-Raf(h)</b>        | 105                                                                                   |
| <b>Arg(m)</b>          | 86                                                                                    |
| <b>ARK5(h)</b>         | 91                                                                                    |
| <b>ASK1(h)</b>         | 109                                                                                   |
| <b>Aurora-A(h)</b>     | 104                                                                                   |
| <b>Aurora-B(h)</b>     | 94                                                                                    |
| <b>Aurora-C(h)</b>     | 92                                                                                    |

|                                     |     |
|-------------------------------------|-----|
| <b>Axl(h)</b>                       | 86  |
| <b>BIKe(h)</b>                      | 98  |
| <b>Blk(h)</b>                       | 85  |
| <b>Blk(m)</b>                       | 64  |
| <b>BMPR2(h)</b>                     | 104 |
| <b>Bmx(h)</b>                       | 107 |
| <b>BRK(h)</b>                       | 31  |
| <b>BrSK1(h)</b>                     | 104 |
| <b>BrSK2(h)</b>                     | 118 |
| <b>BTK(h)</b>                       | 107 |
| <b>BTK(R28H)(h)</b>                 | 102 |
| <b>B-Raf(h)</b>                     | 96  |
| <b>B-Raf(V599E)(h)</b>              | 92  |
| <b>CaMKI(h)</b>                     | 113 |
| <b>CaMKI<math>\beta</math>(h)</b>   | 106 |
| <b>CaMKI<math>\gamma</math>(h)</b>  | 102 |
| <b>CaMKII<math>\alpha</math>(h)</b> | 106 |
| <b>CaMKII<math>\beta</math>(h)</b>  | 106 |
| <b>CaMKII<math>\gamma</math>(h)</b> | 100 |
| <b>CaMKI<math>\delta</math>(h)</b>  | 106 |
| <b>CaMKII<math>\delta</math>(h)</b> | 84  |
| <b>CaMKIV(h)</b>                    | 107 |
| <b>CaMKK1(h)</b>                    | 107 |
| <b>CaMKK2(h)</b>                    | 109 |
| <b>Cdc7/cyclinB1(h)</b>             | 117 |
| <b>CDK1/cyclinB(h)</b>              | 99  |
| <b>CDK2/cyclinA(h)</b>              | 100 |
| <b>CDK2/cyclinE(h)</b>              | 107 |
| <b>CDK3/cyclinE(h)</b>              | 118 |
| <b>CDK4/cyclinD3(h)</b>             | 125 |
| <b>CDK5/p25(h)</b>                  | 109 |
| <b>CDK5/p35(h)</b>                  | 112 |
| <b>CDK6/cyclinD3(h)</b>             | 117 |
| <b>CDK7/cyclinH/MAT1(h)</b>         | 115 |
| <b>CDK9/cyclin T1(h)</b>            | 100 |
| <b>CDK12/cyclinK(h)</b>             | 123 |
| <b>CDK13/cyclinK(h)</b>             | 118 |
| <b>CDK14/cyclinY(h)</b>             | 102 |
| <b>CDK16/cyclinY(h)</b>             | 110 |
| <b>CDK17/cyclinY(h)</b>             | 108 |
| <b>CDK18/cyclinY(h)</b>             | 97  |
| <b>CDKL1(h)</b>                     | 108 |
| <b>CDKL2(h)</b>                     | 104 |
| <b>CDKL3(h)</b>                     | 113 |
| <b>CDKL4(h)</b>                     | 115 |

|                                    |     |
|------------------------------------|-----|
| <b>ChaK1(h)</b>                    | 107 |
| <b>CHK1(h)</b>                     | 100 |
| <b>CHK2(h)</b>                     | 111 |
| <b>CHK2(I157T)(h)</b>              | 97  |
| <b>CHK2(R145W)(h)</b>              | 102 |
| <b>CK1<math>\alpha</math>(h)</b>   | 95  |
| <b>CK1<math>\epsilon</math>(h)</b> | 119 |
| <b>CK1<math>\gamma</math>1(h)</b>  | 96  |
| <b>CK1<math>\gamma</math>2(h)</b>  | 108 |
| <b>CK1<math>\gamma</math>3(h)</b>  | 104 |
| <b>CK1<math>\delta</math>(h)</b>   | 107 |
| <b>CK1(y)</b>                      | 48  |
| <b>CK2(h)</b>                      | 110 |
| <b>CK2<math>\alpha</math>1(h)</b>  | 85  |
| <b>CK2<math>\alpha</math>2(h)</b>  | 105 |
| <b>CLIK1(h)</b>                    | 111 |
| <b>CLK1(h)</b>                     | 112 |
| <b>CLK2(h)</b>                     | 104 |
| <b>CLK3(h)</b>                     | 103 |
| <b>CLK4(h)</b>                     | 106 |
| <b>cKit(h)</b>                     | 107 |
| <b>cKit(D816V)(h)</b>              | 87  |
| <b>cKit(D816H)(h)</b>              | 98  |
| <b>cKit(V560G)(h)</b>              | 92  |
| <b>cKit(V654A)(h)</b>              | 89  |
| <b>CRIK(h)</b>                     | 97  |
| <b>CSK(h)</b>                      | 106 |
| <b>c-RAF(h)</b>                    | 101 |
| <b>cSRC(h)</b>                     | 92  |
| <b>DAPK1(h)</b>                    | 101 |
| <b>DAPK2(h)</b>                    | 108 |
| <b>DCAMKL1(h)</b>                  | 101 |
| <b>DCAMKL2(h)</b>                  | 104 |
| <b>DCAMKL3(h)</b>                  | 121 |
| <b>DDR1(h)</b>                     | 29  |
| <b>DDR2(h)</b>                     | 91  |
| <b>DMPK(h)</b>                     | 100 |
| <b>DRAK1(h)</b>                    | 107 |
| <b>DRAK2(h)</b>                    | 111 |
| <b>DYRK1A(h)</b>                   | 113 |
| <b>DYRK1B(h)</b>                   | 110 |
| <b>DYRK2(h)</b>                    | 96  |
| <b>DYRK3(h)</b>                    | 108 |
| <b>eEF-2K(h)</b>                   | 109 |
| <b>EGFR(h)</b>                     | 93  |

|                                   |     |
|-----------------------------------|-----|
| <b>EGFR(L858R)(h)</b>             | 36  |
| <b>EGFR(L861Q)(h)</b>             | 48  |
| <b>EGFR(T790M)(h)</b>             | 103 |
| <b>EGFR(T790M,L858R)(h)</b>       | 106 |
| <b>EphA1(h)</b>                   | 90  |
| <b>EphA2(h)</b>                   | 103 |
| <b>EphA3(h)</b>                   | 109 |
| <b>EphA4(h)</b>                   | 103 |
| <b>EphA5(h)</b>                   | 107 |
| <b>EphA7(h)</b>                   | 113 |
| <b>EphA8(h)</b>                   | 96  |
| <b>EphB2(h)</b>                   | 92  |
| <b>EphB1(h)</b>                   | 101 |
| <b>EphB3(h)</b>                   | 93  |
| <b>EphB4(h)</b>                   | 101 |
| <b>ErbB2(h)</b>                   | 106 |
| <b>ErbB4(h)</b>                   | 112 |
| <b>FAK(h)</b>                     | 102 |
| <b>Fer(h)</b>                     | 111 |
| <b>Fes(h)</b>                     | 86  |
| <b>FGFR1(h)</b>                   | 87  |
| <b>FGFR1(V561M)(h)</b>            | 91  |
| <b>FGFR2(h)</b>                   | 98  |
| <b>FGFR2(N549H)(h)</b>            | 95  |
| <b>FGFR3(h)</b>                   | 93  |
| <b>FGFR4(h)</b>                   | 111 |
| <b>Fgr(h)</b>                     | 93  |
| <b>Flt1(h)</b>                    | 99  |
| <b>Flt3(D835Y)(h)</b>             | 99  |
| <b>Flt3(h)</b>                    | 98  |
| <b>Flt4(h)</b>                    | 86  |
| <b>Fms(h)</b>                     | 105 |
| <b>Fms(Y969C)(h)</b>              | 87  |
| <b>Fyn(h)</b>                     | 94  |
| <b>GCK(h)</b>                     | 85  |
| <b>GCN2(h)</b>                    | 104 |
| <b>GRK1(h)</b>                    | 94  |
| <b>GRK2(h)</b>                    | 92  |
| <b>GRK3(h)</b>                    | 95  |
| <b>GRK5(h)</b>                    | 108 |
| <b>GRK6(h)</b>                    | 112 |
| <b>GRK7(h)</b>                    | 102 |
| <b>GSK3<math>\alpha</math>(h)</b> | 101 |
| <b>GSK3<math>\beta</math>(h)</b>  | 101 |
| <b>Haspin(h)</b>                  | 103 |

|                                    |     |
|------------------------------------|-----|
| <b>Hck(h)</b>                      | 102 |
| <b>Hck(h) activated</b>            | 101 |
| <b>HIPK1(h)</b>                    | 107 |
| <b>HIPK2(h)</b>                    | 110 |
| <b>HIPK3(h)</b>                    | 103 |
| <b>HIPK4(h)</b>                    | 116 |
| <b>HPK1(h)</b>                     | 109 |
| <b>HRI(h)</b>                      | 96  |
| <b>ICK(h)</b>                      | 113 |
| <b>IGF-1R(h)</b>                   | 93  |
| <b>IGF-1R(h), activated</b>        | 111 |
| <b>IKK<math>\alpha</math>(h)</b>   | 120 |
| <b>IKK<math>\beta</math>(h)</b>    | 104 |
| <b>IKK<math>\epsilon</math>(h)</b> | 102 |
| <b>IR(h)</b>                       | 107 |
| <b>IR(h), activated</b>            | 116 |
| <b>IRE1(h)</b>                     | 100 |
| <b>IRR(h)</b>                      | 96  |
| <b>IRAK1(h)</b>                    | 106 |
| <b>IRAK4(h)</b>                    | 97  |
| <b>Itk(h)</b>                      | 97  |
| <b>JAK1(h)</b>                     | 90  |
| <b>JAK2(h)</b>                     | 106 |
| <b>JAK3(h)</b>                     | 105 |
| <b>JNK1<math>\alpha</math>1(h)</b> | 100 |
| <b>JNK2<math>\alpha</math>2(h)</b> | 118 |
| <b>JNK3(h)</b>                     | 99  |
| <b>KDR(h)</b>                      | 110 |
| <b>LATS1(h)</b>                    | 118 |
| <b>LATS2(h)</b>                    | 109 |
| <b>Lck(h)</b>                      | 49  |
| <b>Lck(h) activated</b>            | 81  |
| <b>LIMK1(h)</b>                    | 91  |
| <b>LIMK2(h)</b>                    | 109 |
| <b>LKB1(h)</b>                     | 101 |
| <b>LOK(h)</b>                      | 99  |
| <b>Lyn(h)</b>                      | 41  |
| <b>Lyn(m)</b>                      | 44  |
| <b>LRRK2(h)</b>                    | 103 |
| <b>LTK(h)</b>                      | 107 |
| <b>MAK(h)</b>                      | 109 |
| <b>MAPK1(h)</b>                    | 90  |
| <b>MAPK2(h)</b>                    | 110 |
| <b>MAPK2(m)</b>                    | 98  |
| <b>MAP4K3(h)</b>                   | 98  |

|                                   |     |
|-----------------------------------|-----|
| <b>MAP4K4(h)</b>                  | 75  |
| <b>MAP4K5(h)</b>                  | 94  |
| <b>MAPKAP-K2(h)</b>               | 108 |
| <b>MAPKAP-K3(h)</b>               | 114 |
| <b>MEK1(h)</b>                    | 88  |
| <b>MEK2(h)</b>                    | 102 |
| <b>MARK1(h)</b>                   | 103 |
| <b>MARK3(h)</b>                   | 111 |
| <b>MARK4(h)</b>                   | 105 |
| <b>MEKK2(h)</b>                   | 103 |
| <b>MEKK3(h)</b>                   | 108 |
| <b>MELK(h)</b>                    | 99  |
| <b>Mer(h)</b>                     | 120 |
| <b>Met(h)</b>                     | 99  |
| <b>Met(D1246H)(h)</b>             | 94  |
| <b>Met(D1246N)(h)</b>             | 105 |
| <b>Met(M1268T)(h)</b>             | 86  |
| <b>Met(Y1248C)(h)</b>             | 92  |
| <b>Met(Y1248D)(h)</b>             | 90  |
| <b>Met(Y1248H)(h)</b>             | 86  |
| <b>MINK(h)</b>                    | 61  |
| <b>MKK3(h)</b>                    | 93  |
| <b>MKK4(m)</b>                    | 88  |
| <b>MKK6(h)</b>                    | 101 |
| <b>MLCK(h)</b>                    | 102 |
| <b>MLK1(h)</b>                    | 106 |
| <b>MLK2(h)</b>                    | 117 |
| <b>MLK3(h)</b>                    | 104 |
| <b>MLK4(h)</b>                    | 116 |
| <b>Mnk2(h)</b>                    | 100 |
| <b>MOK(h)</b>                     | 103 |
| <b>MRCK<math>\alpha</math>(h)</b> | 108 |
| <b>MRCK<math>\beta</math>(h)</b>  | 109 |
| <b>MRCK<math>\gamma</math>(h)</b> | 102 |
| <b>MSK1(h)</b>                    | 114 |
| <b>MSK2(h)</b>                    | 115 |
| <b>MSSK1(h)</b>                   | 123 |
| <b>MST1(h)</b>                    | 97  |
| <b>MST2(h)</b>                    | 93  |
| <b>MST3(h)</b>                    | 112 |
| <b>MST4(h)</b>                    | 115 |
| <b>mTOR(h)</b>                    | 102 |
| <b>mTOR/FKBP12(h)</b>             | 103 |
| <b>MuSK(h)</b>                    | 113 |
| <b>MYLK2(h)</b>                   | 105 |

|                                           |     |
|-------------------------------------------|-----|
| <b>MYO3B(h)</b>                           | 104 |
| <b>NDR1(h)</b>                            | 118 |
| <b>NDR2(h)</b>                            | 101 |
| <b>NEK1(h)</b>                            | 112 |
| <b>NEK2(h)</b>                            | 92  |
| <b>NEK3(h)</b>                            | 100 |
| <b>NEK4(h)</b>                            | 105 |
| <b>NEK6(h)</b>                            | 109 |
| <b>NEK7(h)</b>                            | 99  |
| <b>NEK9(h)</b>                            | 103 |
| <b>NIM1(h)</b>                            | 108 |
| <b>NEK11(h)</b>                           | 112 |
| <b>NLK(h)</b>                             | 94  |
| <b>NUAK2(h)</b>                           | 113 |
| <b>OSR1(h)</b>                            | 103 |
| <b>p70S6K(h)</b>                          | 102 |
| <b>PAK1(h)</b>                            | 97  |
| <b>PAK2(h)</b>                            | 101 |
| <b>PAK4(h)</b>                            | 108 |
| <b>PAK3(h)</b>                            | 105 |
| <b>PAK5(h)</b>                            | 112 |
| <b>PAK6(h)</b>                            | 111 |
| <b>PAR-1B<math>\alpha</math>(h)</b>       | 118 |
| <b>PASK(h)</b>                            | 117 |
| <b>PEK(h)</b>                             | 109 |
| <b>PDGFR<math>\alpha</math>(h)</b>        | 94  |
| <b>PDGFR<math>\alpha</math>(D842V)(h)</b> | 73  |
| <b>PDGFR<math>\alpha</math>(V561D)(h)</b> | 76  |
| <b>PDGFR<math>\beta</math>(h)</b>         | 88  |
| <b>PDHK2(h)</b>                           | 138 |
| <b>PDHK4(h)</b>                           | 113 |
| <b>PDK1(h)</b>                            | 97  |
| <b>PhK<math>\gamma</math>1(h)</b>         | 112 |
| <b>PhK<math>\gamma</math>2(h)</b>         | 118 |
| <b>Pim-1(h)</b>                           | 105 |
| <b>Pim-2(h)</b>                           | 110 |
| <b>Pim-3(h)</b>                           | 103 |
| <b>PKA(h)</b>                             | 102 |
| <b>PKAc<math>\beta</math>(h)</b>          | 113 |
| <b>PKB<math>\alpha</math>(h)</b>          | 92  |
| <b>PKB<math>\beta</math>(h)</b>           | 132 |
| <b>PKB<math>\gamma</math>(h)</b>          | 103 |
| <b>PKC<math>\alpha</math>(h)</b>          | 88  |
| <b>PKC<math>\beta</math>I(h)</b>          | 102 |
| <b>PKC<math>\beta</math>II(h)</b>         | 100 |



|                                    |     |
|------------------------------------|-----|
| <b>PKC<math>\gamma</math>(h)</b>   | 100 |
| <b>PKC<math>\delta</math>(h)</b>   | 104 |
| <b>PKC<math>\epsilon</math>(h)</b> | 103 |
| <b>PKC<math>\eta</math>(h)</b>     | 115 |
| <b>PKC<math>\iota</math>(h)</b>    | 105 |
| <b>PKC<math>\mu</math>(h)</b>      | 107 |
| <b>PKC<math>\theta</math>(h)</b>   | 117 |
| <b>PKC<math>\zeta</math>(h)</b>    | 108 |
| <b>PKD2(h)</b>                     | 100 |
| <b>PKD3(h)</b>                     | 92  |
| <b>PKG1<math>\alpha</math>(h)</b>  | 96  |
| <b>PKG1<math>\beta</math>(h)</b>   | 107 |
| <b>PKR(h)</b>                      | 102 |
| <b>Plk1(h)</b>                     | 99  |
| <b>Plk3(h)</b>                     | 101 |
| <b>Plk4(h)</b>                     | 92  |
| <b>PRAK(h)</b>                     | 104 |
| <b>PRKG2(h)</b>                    | 110 |
| <b>PRK1(h)</b>                     | 102 |
| <b>PRK2(h)</b>                     | 112 |
| <b>PrKX(h)</b>                     | 104 |
| <b>PRP4(h)</b>                     | 99  |
| <b>PTK5(h)</b>                     | 73  |
| <b>Pyk2(h)</b>                     | 100 |
| <b>Ret(h)</b>                      | 99  |
| <b>Ret (V804L)(h)</b>              | 108 |
| <b>Ret(V804M)(h)</b>               | 102 |
| <b>RIPK1(h)</b>                    | 108 |
| <b>RIPK2(h)</b>                    | 27  |
| <b>ROCK-I(h)</b>                   | 98  |
| <b>ROCK-II(h)</b>                  | 104 |
| <b>ROCK-II(r)</b>                  | 92  |
| <b>Ron(h)</b>                      | 102 |
| <b>Ros(h)</b>                      | 119 |
| <b>Rse(h)</b>                      | 102 |
| <b>Rsk1(h)</b>                     | 110 |
| <b>Rsk1(r)</b>                     | 110 |
| <b>Rsk2(h)</b>                     | 101 |
| <b>Rsk3(h)</b>                     | 98  |
| <b>Rsk4(h)</b>                     | 125 |
| <b>SAPK2a(h)</b>                   | 98  |
| <b>SAPK2a(T106M)(h)</b>            | 93  |
| <b>SAPK2b(h)</b>                   | 92  |
| <b>SAPK3(h)</b>                    | 106 |
| <b>SAPK4(h)</b>                    | 109 |

|                         |     |
|-------------------------|-----|
| <b>SBK1(h)</b>          | 109 |
| <b>SGK(h)</b>           | 118 |
| <b>SGK2(h)</b>          | 128 |
| <b>SGK3(h)</b>          | 108 |
| <b>SIK(h)</b>           | 92  |
| <b>SIK2(h)</b>          | 79  |
| <b>SIK3(h)</b>          | 102 |
| <b>SLK(h)</b>           | 106 |
| <b>Snk(h)</b>           | 106 |
| <b>SNRK(h)</b>          | 118 |
| <b>Src(1-530)(h)</b>    | 94  |
| <b>Src(T341M)(h)</b>    | 96  |
| <b>SRMS(h)</b>          | 117 |
| <b>SRPK1(h)</b>         | 98  |
| <b>SRPK2(h)</b>         | 110 |
| <b>STK16(h)</b>         | 108 |
| <b>STK25(h)</b>         | 103 |
| <b>STK32A(h)</b>        | 104 |
| <b>STK32B(h)</b>        | 101 |
| <b>STK32C(h)</b>        | 131 |
| <b>STK33(h)</b>         | 111 |
| <b>STK39(h)</b>         | 105 |
| <b>Syk(h)</b>           | 84  |
| <b>TAF1L(h)</b>         | 115 |
| <b>TAK1(h)</b>          | 95  |
| <b>TAO1(h)</b>          | 90  |
| <b>TAO2(h)</b>          | 111 |
| <b>TAO3(h)</b>          | 97  |
| <b>TBK1(h)</b>          | 114 |
| <b>Tec(h) activated</b> | 107 |
| <b>TGFBR1(h)</b>        | 52  |
| <b>TGFBR2(h)</b>        | 103 |
| <b>Tie2 (h)</b>         | 94  |
| <b>Tie2(R849W)(h)</b>   | 98  |
| <b>Tie2(Y897S)(h)</b>   | 102 |
| <b>TLK1(h)</b>          | 90  |
| <b>TLK2(h)</b>          | 104 |
| <b>TNIK(h)</b>          | 40  |
| <b>TRB2(h)</b>          | 108 |
| <b>TrkA(h)</b>          | 117 |
| <b>TrkB(h)</b>          | 92  |
| <b>TrkC(h)</b>          | 99  |
| <b>TSSK1(h)</b>         | 107 |
| <b>TSSK2(h)</b>         | 99  |
| <b>TSSK3(h)</b>         | 102 |

|                                           |     |
|-------------------------------------------|-----|
| <b>TSSK4(h)</b>                           | 104 |
| <b>TTBK1(h)</b>                           | 98  |
| <b>TTBK2(h)</b>                           | 104 |
| <b>TTK(h)</b>                             | 106 |
| <b>Txk(h)</b>                             | 107 |
| <b>TYK2(h)</b>                            | 103 |
| <b>ULK1(h)</b>                            | 110 |
| <b>ULK2(h)</b>                            | 102 |
| <b>ULK3(h)</b>                            | 107 |
| <b>VRK1(h)</b>                            | 113 |
| <b>VRK2(h)</b>                            | 101 |
| <b>Wee1(h)</b>                            | 95  |
| <b>Wee1B(h)</b>                           | 117 |
| <b>WNK1(h)</b>                            | 103 |
| <b>WNK2(h)</b>                            | 105 |
| <b>WNK3(h)</b>                            | 106 |
| <b>WNK4(h)</b>                            | 123 |
| <b>Yes(h)</b>                             | 64  |
| <b>ZAK(h)</b>                             | 72  |
| <b>ZAP-70(h)</b>                          | 108 |
| <b>ZIPK(h)</b>                            | 108 |
| <b>ATM(h)</b>                             | 99  |
| <b>ATR/ATRIP(h)</b>                       | 93  |
| <b>DNA-PK(h)</b>                          | 106 |
| <b>PI3 Kinase (p110b/p85a)(h)</b>         | 94  |
| <b>PI3 Kinase (p120g)(h)</b>              | 98  |
| <b>PI3 Kinase (p110d/p85a)(h)</b>         | 101 |
| <b>PI3 Kinase (p110a/p85a)(m)</b>         | 102 |
| <b>PI3 Kinase (p110a/p65a)(m)</b>         | 89  |
| <b>PI3 Kinase (p110a(E545K)/p85a)(m)</b>  | 108 |
| <b>PI3 Kinase (p110a(H1047R)/p85a)(m)</b> | 99  |
| <b>PI3 Kinase (p110b/p85b)(m)</b>         | 90  |
| <b>PI3 Kinase (p110b/p85a)(m)</b>         | 88  |
| <b>PI3 Kinase (p110d/p85a)(m)</b>         | 94  |
| <b>PI3 Kinase (p110a(E542K)/p85a)(m)</b>  | 100 |
| <b>PI3 Kinase (p110a/p85a)(h)</b>         | 97  |
| <b>PI3 Kinase (p110a(E542K)/p85a)(h)</b>  | 100 |
| <b>PI3 Kinase (p110a(H1047R)/p85a)(h)</b> | 91  |
| <b>PI3 Kinase (p110a(E545K)/p85a)(h)</b>  | 108 |
| <b>PI3 Kinase (p110a/p65a)(h)</b>         | 102 |
| <b>PI3KC2a(h)</b>                         | 108 |
| <b>PI3KC2g(h)</b>                         | 102 |
| <b>PIP4K2a(h)</b>                         | 106 |
| <b>PIP5K1a(h)</b>                         | 109 |
| <b>PIP5K1g(h)</b>                         | 100 |

**Table S2. Co-crystal ALK2•M4K2304: Diffraction Data Collection and Refinement****Statistics**

| <b>PDB accession code</b>                     | <b>8C7W</b>            |
|-----------------------------------------------|------------------------|
| <b><i>Data Collection Statistics</i></b>      |                        |
| Radiation source                              | Diamond I03            |
| Wavelength (Å)                                | 0.976254               |
| Space group                                   | P3 <sub>2</sub> 21     |
| Unit cell dimensions:                         |                        |
| <i>a</i> , <i>b</i> , <i>c</i> (Å)            | 66.05, 66.05, 145.93   |
| $\alpha$ , $\beta$ , $\gamma$ (°)             | 90, 90, 120            |
| Number of molecules/asymmetric unit           | 1                      |
| Resolution range (Å)                          | 57.20-2.26 (2.30-2.26) |
| Total observations                            | 360338 (18021)         |
| Unique reflections                            | 17992 (874)            |
| Completeness (%)                              | 100.00 (98.76)         |
| Multiplicity                                  | 20.03 (20.62)          |
| $R_{\text{merge}}^a$                          | 0.4368 (2.1056)        |
| Average $I/\sigma(I)$                         | 3.6 (0.54)             |
| CC <sub>1/2</sub> (%)                         | 98.83 (81.65)          |
| <b><i>Refinement and model statistics</i></b> |                        |
| Ligand                                        | M4K2304                |
| Resolution range (Å)                          | 57.20-2.26             |
| Number of reflections used                    | 17918                  |
| $R_{\text{work}}^b/R_{\text{free}}^c$ (%)     | 20.70/23.92            |
| Average B values (Å <sup>2</sup> )            |                        |
| All atoms                                     | 32.590                 |
| Protein atoms                                 | 32.186                 |
| Ligand                                        | 27.715                 |
| PEG                                           | 39.009                 |
| H <sub>2</sub> O                              | 34.440                 |
| Sulfate                                       | 52.055                 |
| Root mean square deviation from ideality      |                        |
| Bond lengths (Å)                              | 0.002                  |
| Bond angles (°)                               | 0.567                  |
| Ramachandran analysis                         |                        |
| Favoured regions / Allowed regions /          | 98.31/1.69/0.00        |

|                          |      |
|--------------------------|------|
| Outliers (% of residues) |      |
| Rotamer outliers (%)     | 0.79 |
| Clashscore               | 2.32 |
| Number of atoms          |      |
| Protein atoms            | 2348 |
| Ligand                   | 34   |
| PEG                      | 16   |
| H <sub>2</sub> O         | 178  |
| Sulfate                  | 35   |

$^a R_{\text{merge}} = \frac{\sum \sum |I_h, i - \langle I \rangle h|}{\sum \sum I_h, i}$  where  $\langle I \rangle h$  is the mean intensity of the symmetry-equivalent reflections.

$^b R_{\text{work}} = \frac{\sum ||F_o| - |F_c||}{\sum |F_o|}$ , where  $F_o$  and  $F_c$  are the observed and calculated structure factor amplitudes, respectively, for reflection  $h$ .

$^c R_{\text{free}}$  is the  $R$  value for a subset of 5% of the reflection data, which were not included in the crystallographic refinement.

**Table S3. Co-crystal ALK2•M4K2308: Diffraction Data Collection and Refinement**

### Statistics

| PDB accession code                        | 8C7Z                   |
|-------------------------------------------|------------------------|
| <b>Data Collection Statistics</b>         |                        |
| Radiation source                          | Diamond I03            |
| Wavelength (Å)                            | 0.976254               |
| Space group                               | P3 <sub>2</sub> 21     |
| Unit cell dimensions:                     |                        |
| <i>a</i> , <i>b</i> , <i>c</i> (Å)        | 67.28, 67.28, 140.76   |
| $\alpha$ , $\beta$ , $\gamma$ (°)         | 90, 90, 120            |
| Number of molecules/asymmetric unit       | 1                      |
| Resolution range (Å)                      | 58.27-2.23 (2.27-2.23) |
| Total observations                        | 380615 (19096)         |
| Unique reflections                        | 18645 (895)            |
| Completeness (%)                          | 100.0 (99.33)          |
| Multiplicity                              | 20.4 (21.3)            |
| $R_{\text{merge}}^a$                      | 0.6976 (4.2176)        |
| Average $I/\sigma(I)$                     | 3.66 (0.55)            |
| CC <sub>1/2</sub> (%)                     | 98.51 (69.61)          |
| <b>Refinement and model statistics</b>    |                        |
| Ligand                                    | M4K2308                |
| Resolution range (Å)                      | 58.27-2.23             |
| Number of reflections used                | 18578                  |
| $R_{\text{work}}^b/R_{\text{free}}^c$ (%) | 21.36/26.13            |
| Average B values (Å <sup>2</sup> )        |                        |

|                                          |                 |
|------------------------------------------|-----------------|
| All atoms                                | 36.863          |
| Protein atoms                            | 36.394          |
| Ligand                                   | 33.705          |
| PEG                                      | 46.528          |
| H <sub>2</sub> O                         | 38.109          |
| Sulfate                                  | 60.188          |
| Ammonium                                 | 26.810          |
| Root mean square deviation from ideality |                 |
| Bond lengths (Å)                         | 0.002           |
| Bond angles (°)                          | 0.46            |
| Ramachandran analysis                    |                 |
| Favoured regions / Allowed regions /     | 97.61/2.39/0.00 |
| Outliers (% of residues)                 |                 |
| Rotamer outliers (%)                     | 0.40            |
| Clashscore                               | 4.17            |
| Number of atoms                          |                 |
| Protein atoms                            | 2345            |
| Ligand                                   | 33              |
| PEG                                      | 44              |
| H <sub>2</sub> O                         | 166             |
| Sulfate                                  | 25              |
| Ammonium                                 | 1               |

<sup>a</sup> $R_{\text{merge}} = \frac{\sum \sum |I_h, i - \langle I \rangle_h|}{\sum \sum I_h, i}$  where  $\langle I \rangle_h$  is the mean intensity of the symmetry-equivalent reflections.

<sup>b</sup> $R_{\text{work}} = \frac{\sum ||F_o| - |F_c||}{\sum |F_o|}$ , where  $F_o$  and  $F_c$  are the observed and calculated structure factor amplitudes, respectively, for reflection  $h$ .

<sup>c</sup> $R_{\text{free}}$  is the  $R$  value for a subset of 5% of the reflection data, which were not included in the crystallographic refinement.

**Table S4. *In Vivo* BBB Penetration of M4K2306**

We decided to run the *in vivo* BBB penetration study of **M4K2306** a second time to ensure the exceptional B/P ratio of the compound.

| Compound                      | $C_{\text{plasma @ 2 h}}$<br>(nM) | $C_{\text{brain @ 2 h}}$<br>(nM) | $C_{\text{plasma @ 4 h}}$<br>(nM) | $C_{\text{brain @ 4 h}}$<br>(nM) | $C_{\text{brain}}/C_{\text{plasma @ 4 h}}$ |
|-------------------------------|-----------------------------------|----------------------------------|-----------------------------------|----------------------------------|--------------------------------------------|
| <b>M4K2009</b>                | 5250                              | 2321                             | 2683                              | 888                              | 0.3                                        |
| <b>M4K2306</b><br>(First run) | 74                                | 3301                             | 40                                | 2692                             | 67.3                                       |

|                                       |    |      |    |      |      |
|---------------------------------------|----|------|----|------|------|
| <b>M4K2306</b><br><b>(Second run)</b> | 75 | 4966 | 45 | 3813 | 84.7 |
|---------------------------------------|----|------|----|------|------|

## 2. <sup>1</sup>H NMR Spectra of Final Compounds

<sup>1</sup>H NMR (500 MHz, METHANOL-*d*<sub>4</sub>) δ ppm 9.02 (s, 1 H) 8.62 (s, 1 H) 7.97 (d, *J*=8.68 Hz, 1 H) 7.25 (d, *J*=1.83 Hz, 1 H) 7.18 (s, 2 H) 7.15 (dd, *J*=8.74, 1.90 Hz, 1 H) 3.95 (s, 6 H) 3.86 (s, 3 H) 3.40 - 3.37 (m, 4 H) 2.71 - 2.68 (m, 4 H) 2.40 (s, 3 H)

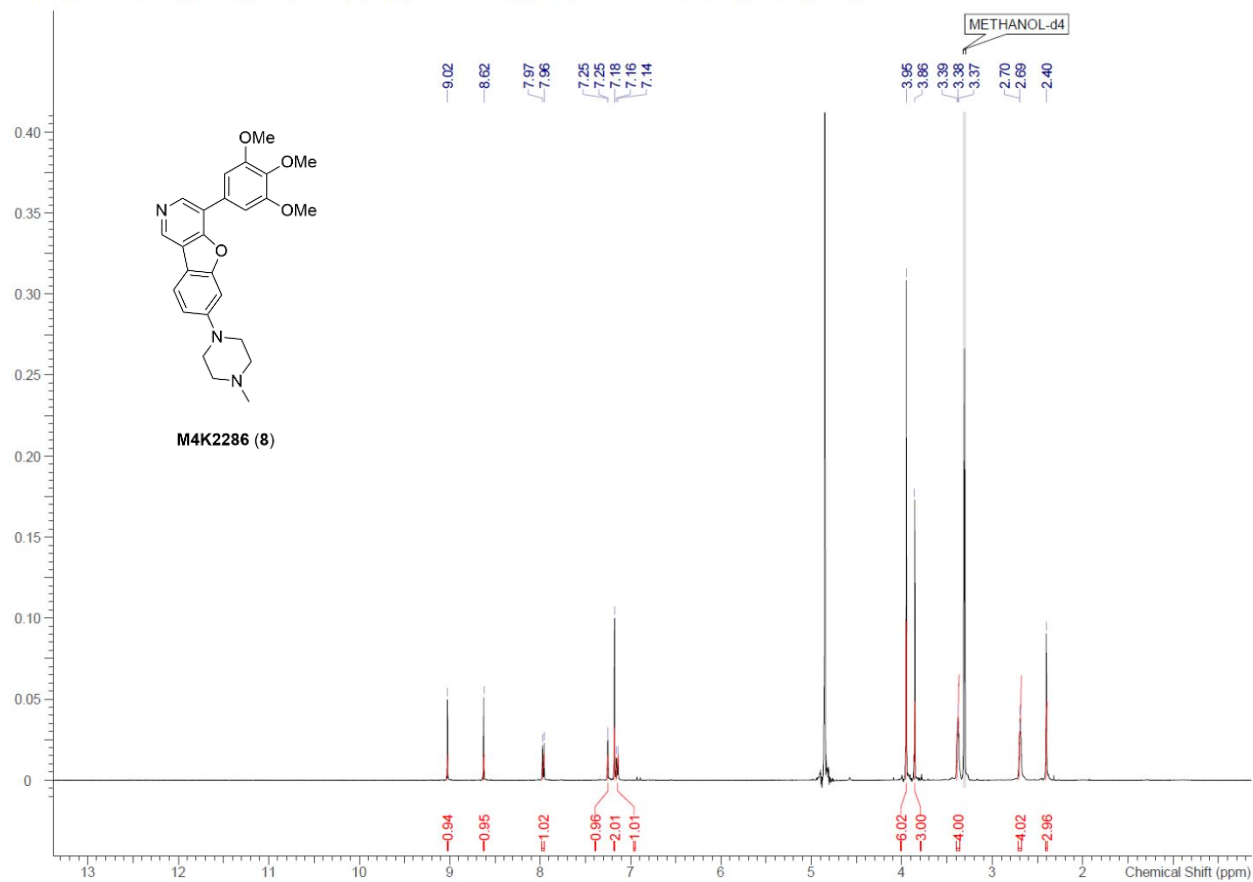



$^1\text{H}$  NMR (500 MHz,  $\text{DMSO}-d_6$ )  $\delta$  ppm 8.93 (s, 1 H) 8.44 (s, 1 H) 7.84 (d,  $J=8.68$  Hz, 1 H) 6.74 (dd,  $J=8.68, 2.08$  Hz, 1 H) 6.68 (s, 2 H) 6.52 (d,  $J=1.96$  Hz, 1 H) 5.14 (s, 2 H) 3.82 (s, 6 H) 3.72 (s, 3 H) 3.23 - 3.20 (m, 4 H) 2.45 - 2.42 (m, 4 H) 2.22 (s, 3 H)

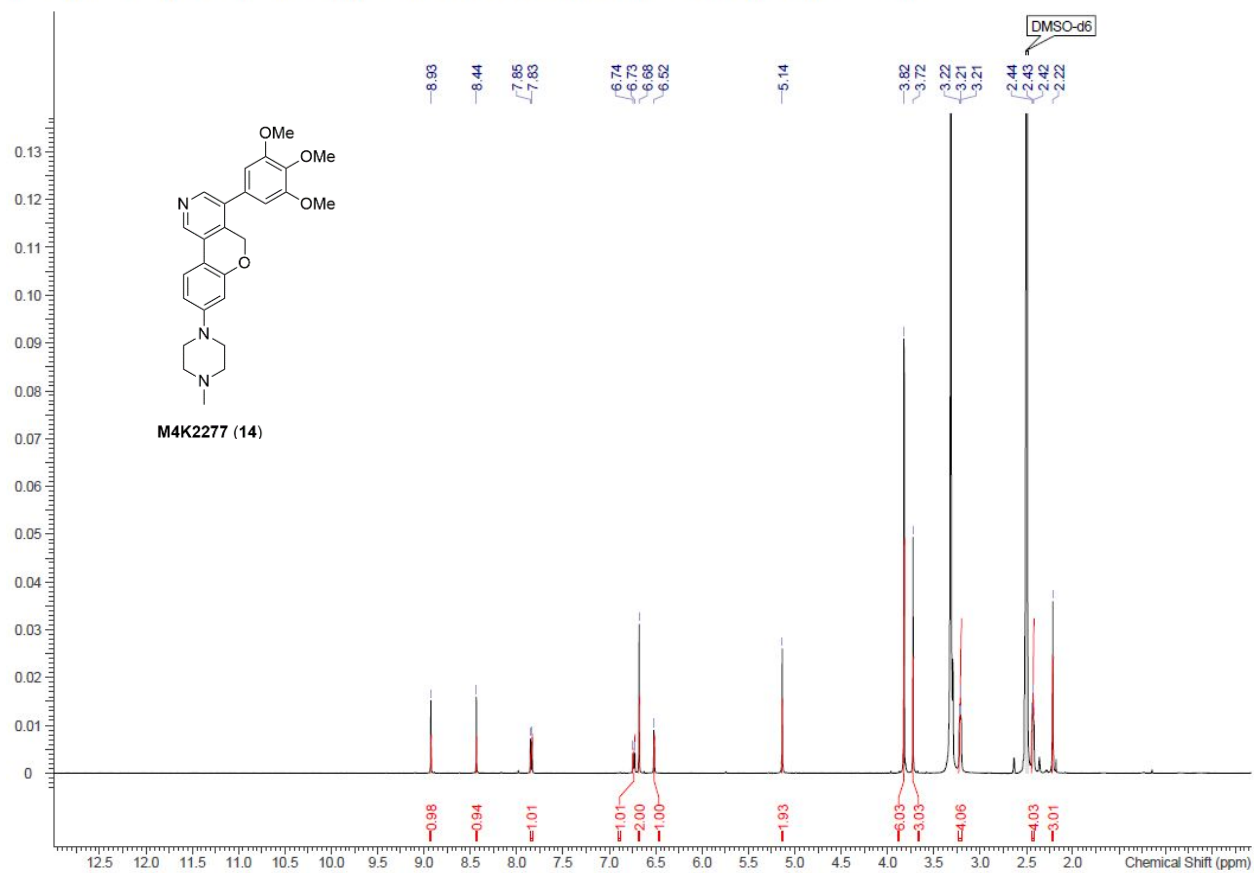

$^1\text{H}$  NMR (500 MHz,  $\text{DMSO}-d_6$ )  $\delta$  ppm 8.74 (s, 1 H) 8.65 (s, 1 H) 7.59 (d,  $J=8.56$  Hz, 1 H) 7.16 (d,  $J=2.08$  Hz, 1 H) 7.11 (dd,  $J=8.56, 2.20$  Hz, 1 H) 6.84 (s, 2 H) 4.40 (s, 2 H) 4.17 (s, 2 H) 3.83 (s, 6 H) 3.73 (s, 3 H) 3.20 - 3.17 (m, 4 H) 2.88 - 2.85 (m, 4 H)

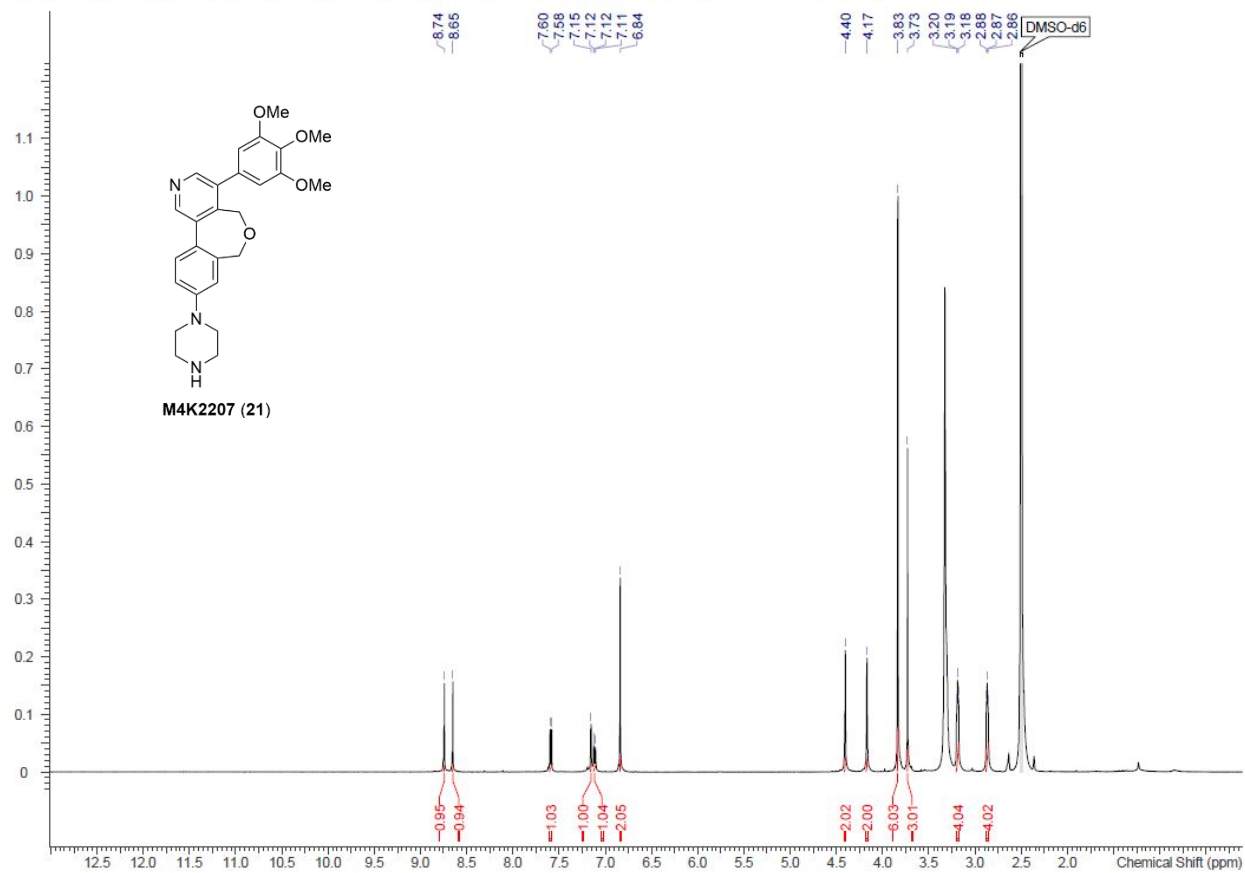

$^1\text{H}$  NMR (500 MHz,  $\text{DMSO-}d_6$ )  $\delta$  ppm 8.74 (s, 1 H) 8.65 (s, 1 H) 7.59 (d,  $J=8.44$  Hz, 1 H) 7.18 (d,  $J=2.08$  Hz, 1 H) 7.13 (dd,  $J=8.50, 2.14$  Hz, 1 H) 6.84 (s, 2 H) 4.40 (s, 2 H) 4.17 (s, 2 H) 3.83 (s, 6 H) 3.73 (s, 3 H) 3.28 - 3.26 (m, 4 H) 2.48 - 2.47 (m, 4 H) 2.24 (s, 3 H)

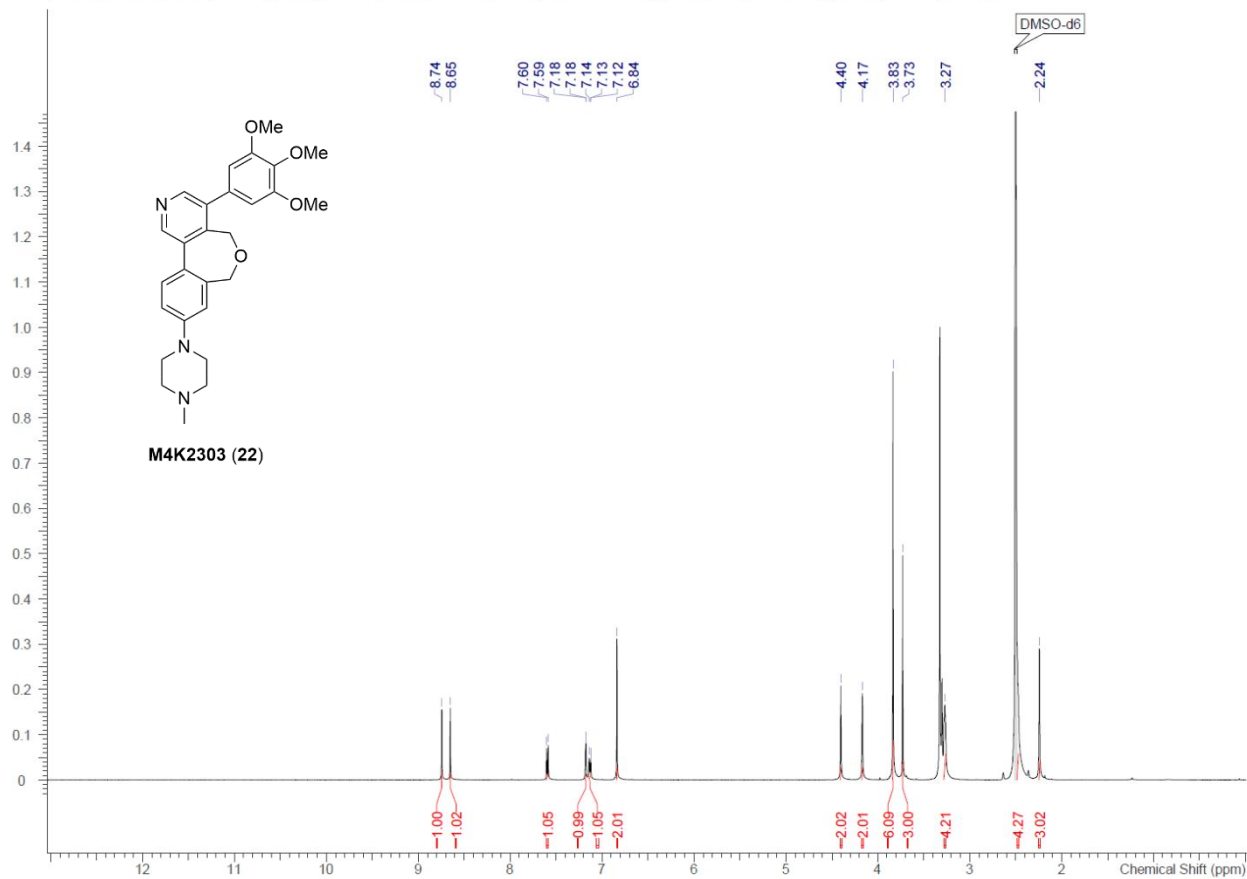

$^1\text{H}$  NMR (500 MHz, METHANOL- $d_4$ )  $\delta$  ppm 8.48 (s, 1 H) 8.37 (s, 1 H) 7.41 (d,  $J=8.56$  Hz, 1 H) 6.94 (dd,  $J=8.56, 2.45$  Hz, 1 H) 6.78 (d,  $J=2.45$  Hz, 1 H) 6.67 (s, 2 H) 4.57 (t,  $J=6.36$  Hz, 2 H) 3.88 (s, 6 H) 3.82 (s, 3 H) 3.30 - 3.28 (m, 4 H) 3.09 - 3.06 (m, 4 H) 2.81 (t,  $J=6.30$  Hz, 2 H)

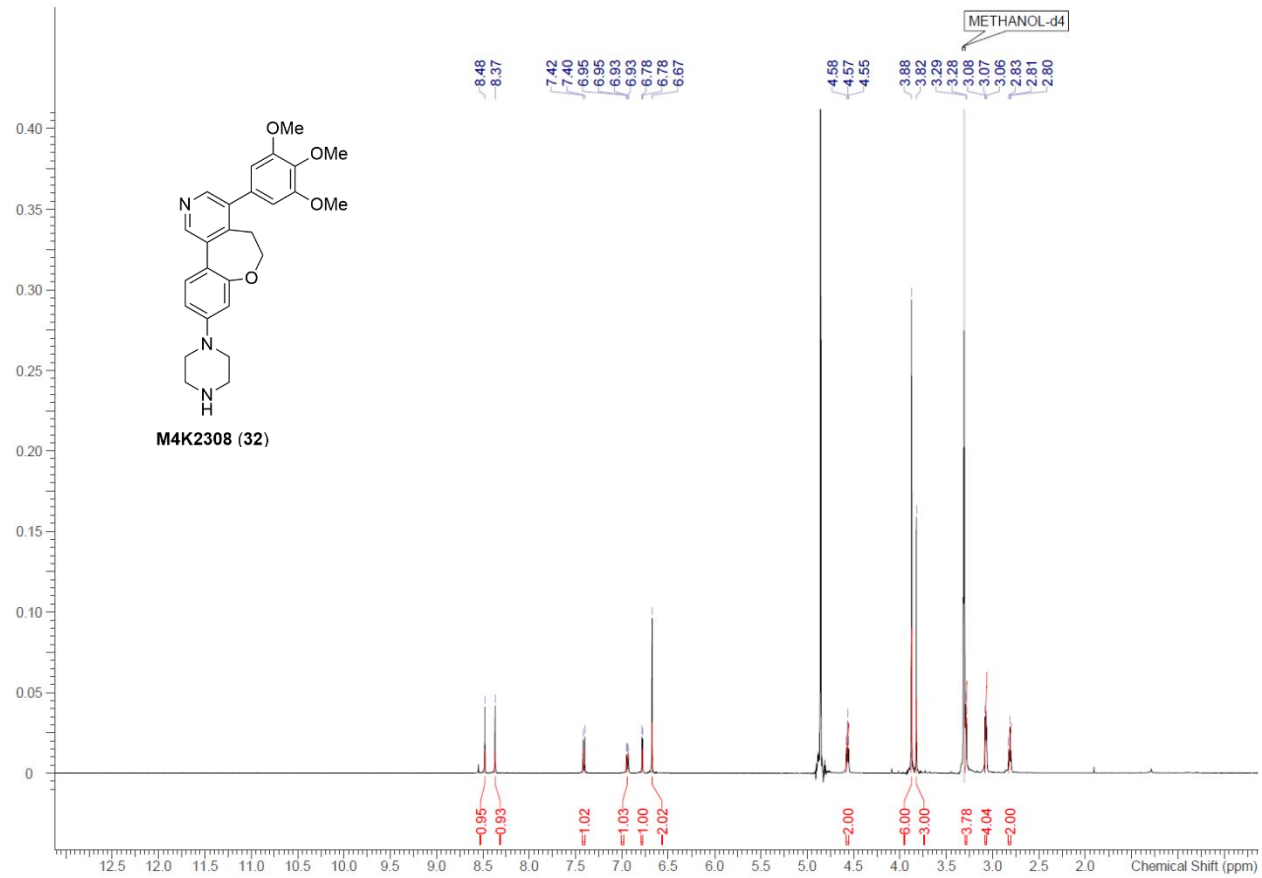

$^1\text{H}$  NMR (500 MHz, METHANOL- $d_4$ )  $\delta$  ppm 8.48 (s, 1 H) 8.37 (s, 1 H) 7.41 (d,  $J=8.56$  Hz, 1 H) 6.95 (dd,  $J=8.56, 2.57$  Hz, 1 H) 6.79 (d,  $J=2.45$  Hz, 1 H) 6.67 (s, 2 H) 4.57 (t,  $J=6.36$  Hz, 2 H) 3.87 (s, 6 H) 3.82 (s, 3 H) 3.38 - 3.35 (m, 4 H) 2.84 - 2.80 (m, 6 H) 2.51 (s, 3 H)

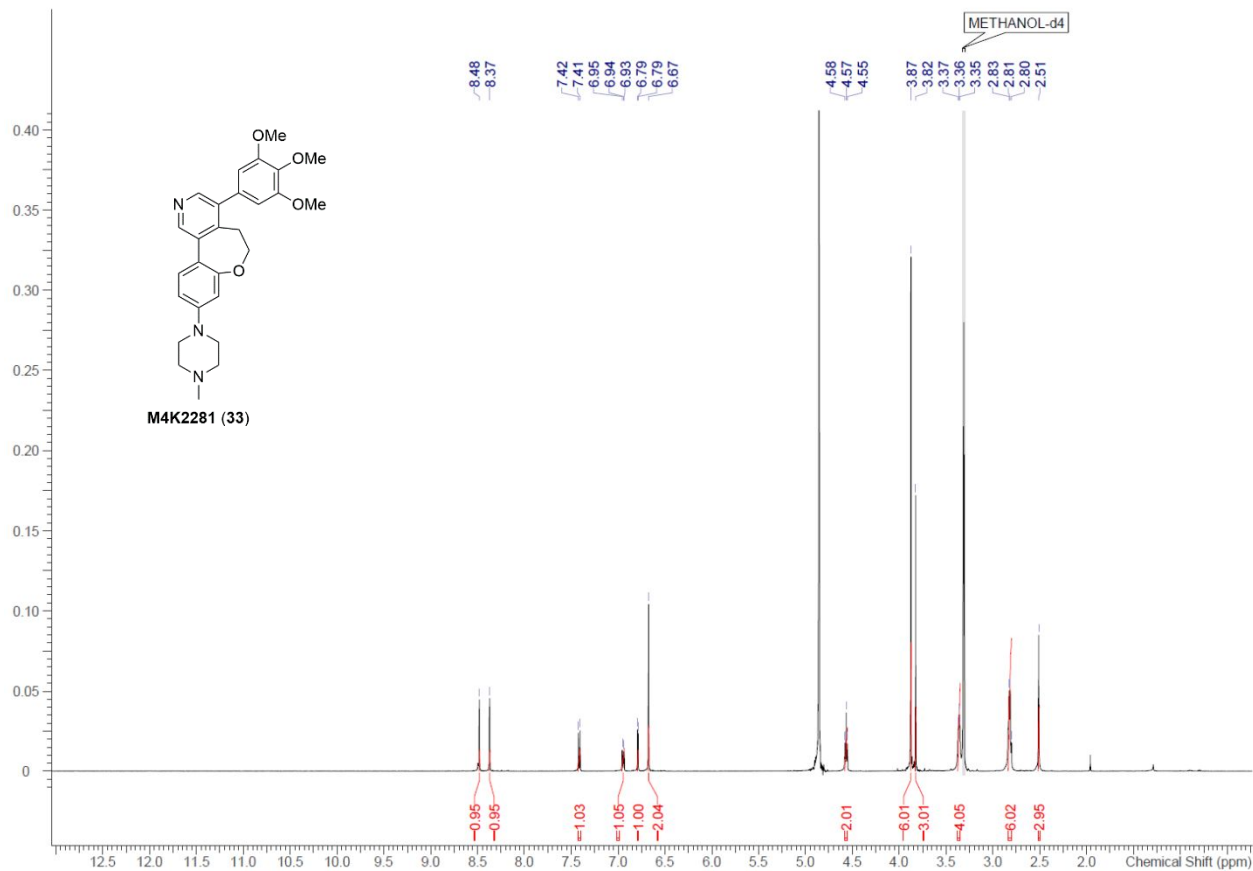

$^1\text{H}$  NMR (500 MHz, METHANOL- $d_4$ )  $\delta$  ppm 8.58 (s, 1 H) 8.49 (s, 1 H) 7.51 (d,  $J=8.44$  Hz, 1 H) 7.12 (dd,  $J=8.50, 2.38$  Hz, 1 H) 7.04 (d,  $J=2.32$  Hz, 1 H) 6.89 (s, 2 H) 3.89 (s, 6 H) 3.83 (s, 3 H) 3.51 (s, 2 H) 3.30 - 3.29 (m, 4 H) 3.06 - 3.04 (m, 4 H) 2.33 (s, 3 H) 1.29 (s, 2 H)

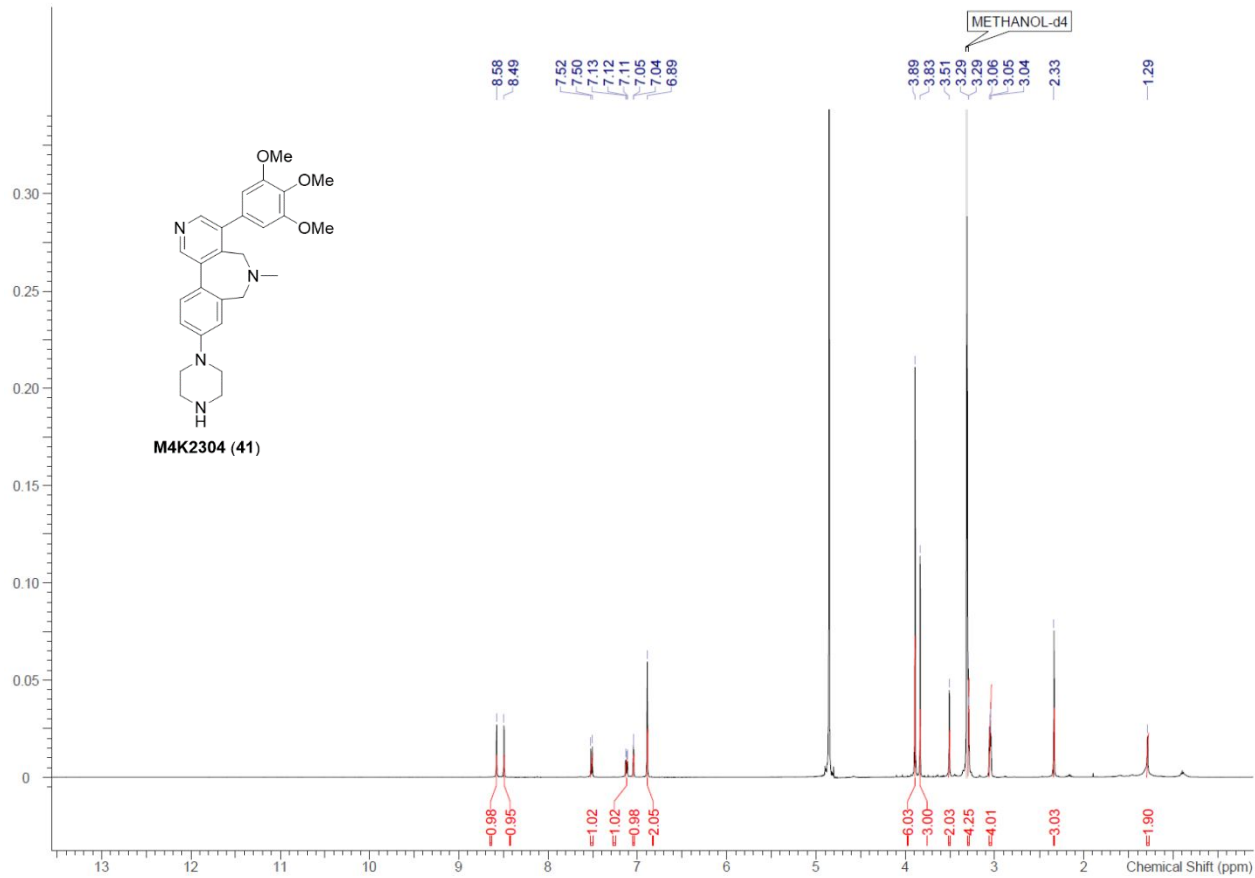

$^1\text{H}$  NMR (500 MHz, METHANOL- $d_4$ )  $\delta$  ppm 8.58 (s, 1 H) 8.49 (s, 1 H) 7.51 (d,  $J=8.44$  Hz, 1 H) 7.13 (dd,  $J=8.44, 2.45$  Hz, 1 H) 7.05 (d,  $J=2.45$  Hz, 1 H) 6.89 (s, 2 H) 3.89 (s, 6 H) 3.83 (s, 3 H) 3.52 (s, 2 H) 3.37 - 3.35 (m, 4 H) 2.73 - 2.70 (m, 4 H) 2.42 (s, 3 H) 2.34 (s, 3 H) 1.93 (s, 2 H)

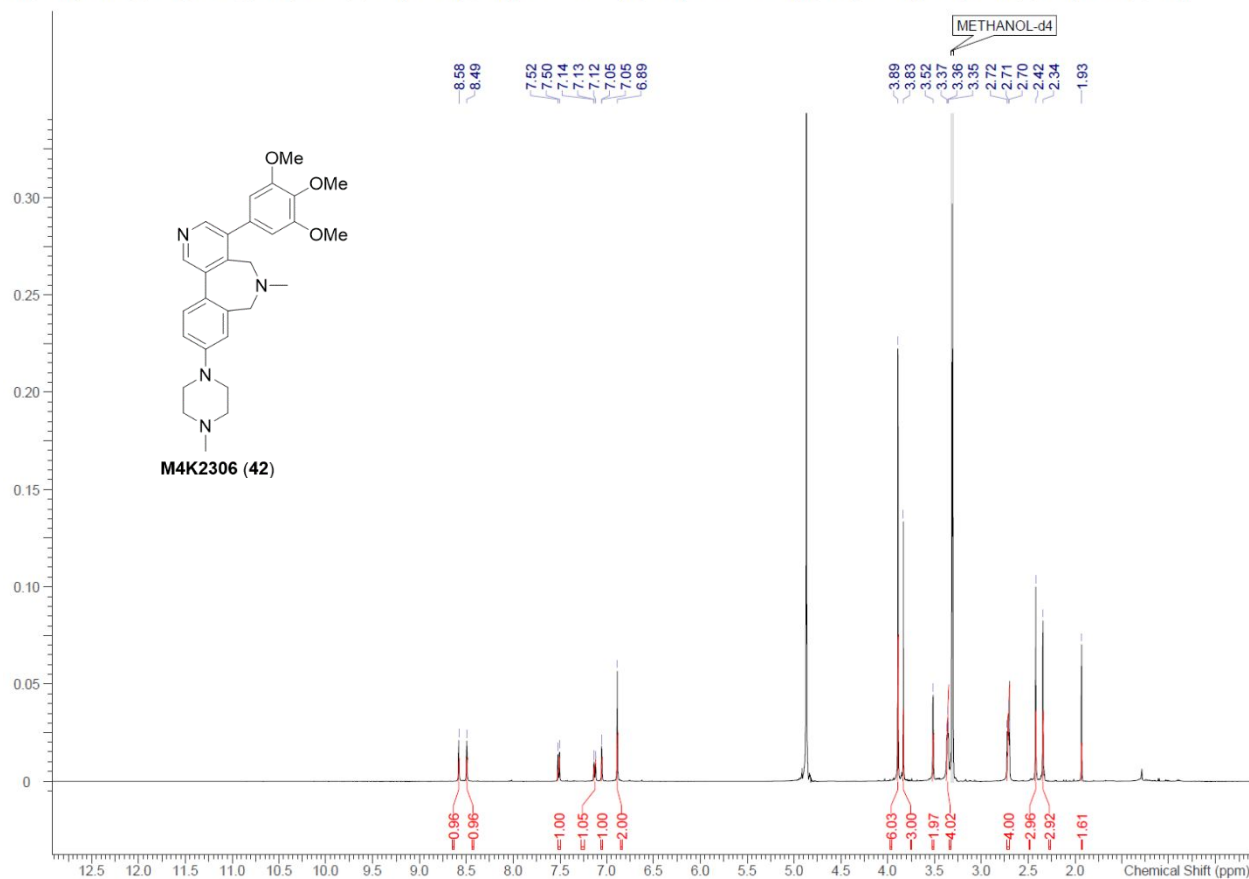

### 3. HPLC Traces of Final Compounds

Compound purity was determined by UV absorbance at 254 nm during tandem liquid chromatography/mass spectrometry (LCMS) using a Waters Acquity separations module. All final compounds had a purity of  $\geq 95\%$  as determined using this method. The column used was an Acquity UPLC HSS T3 ( $2.1 \times 50$  mm,  $100 \text{ \AA}$ ,  $1.8 \mu\text{m}$ , part no. 186003538). Mobile phase A consisted of 0.1% formic acid in water, while mobile phase B consisted of 0.1% formic acid in acetonitrile. The gradient went from 98% to 5% mobile phase A over 1.8 min, maintained at 5% for 0.5 min, then increased to 98% over 0.2 min for a total run time of 3 min. The flow rate was 0.4 mL/min, and column temperature was maintained at 25 °C.

### M4K2286 (8)

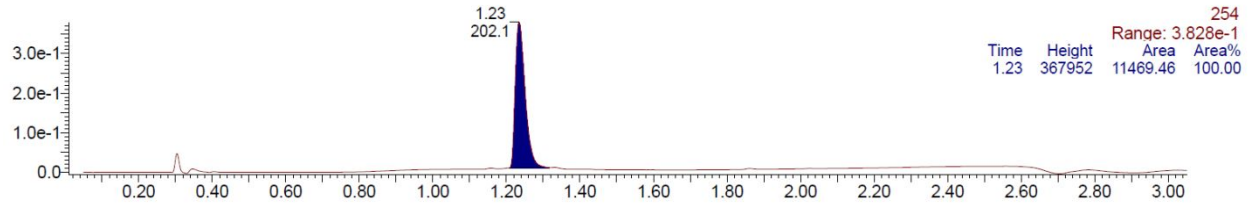

### M4K2277 (14)

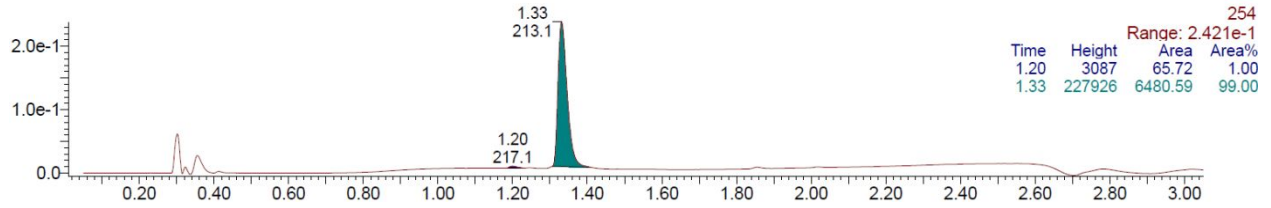

### M4K2207 (21)

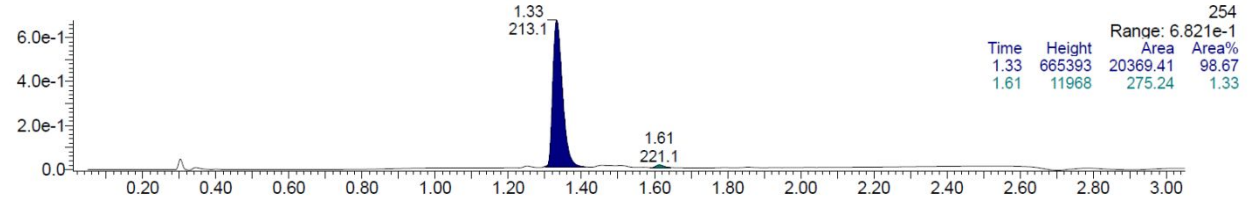

### M4K2303 (22)

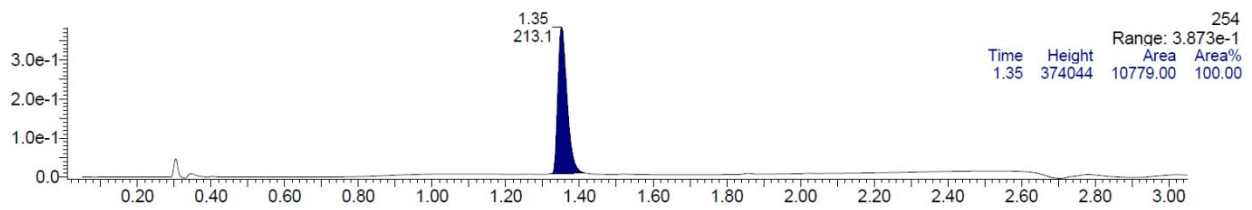

### M4K2308 (32)

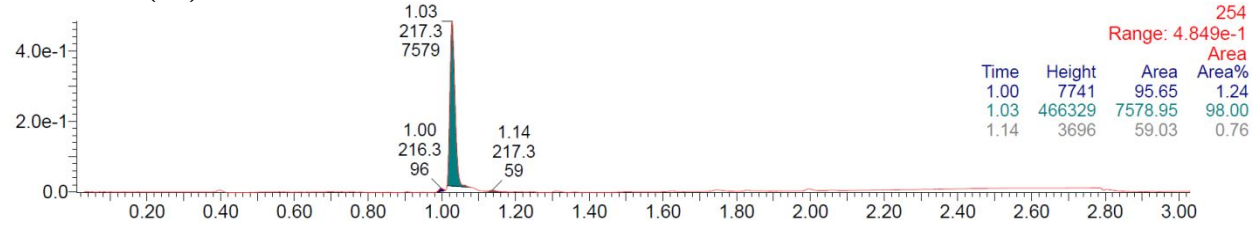

### M4K2281 (33)

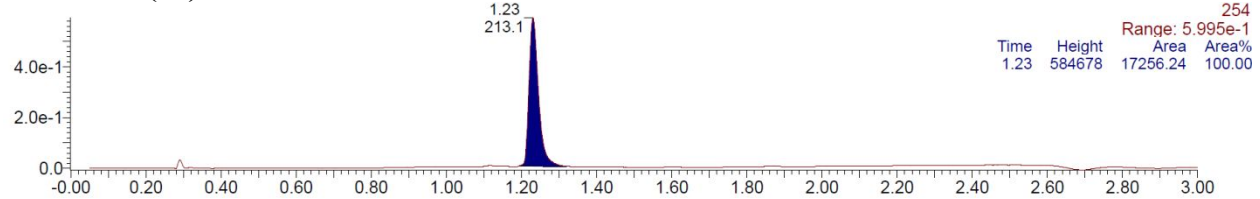



### M4K2304 (41)

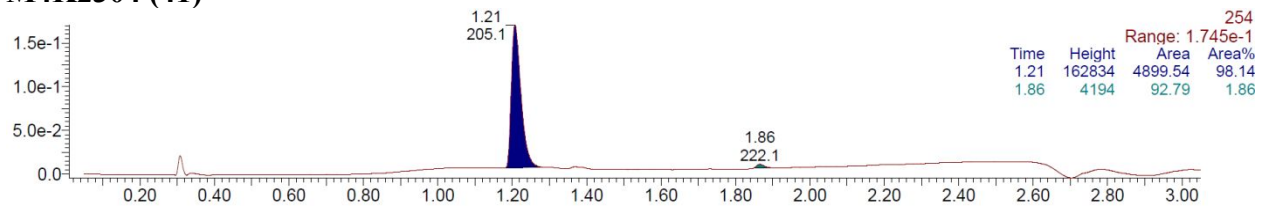

### M4K2306 (42)

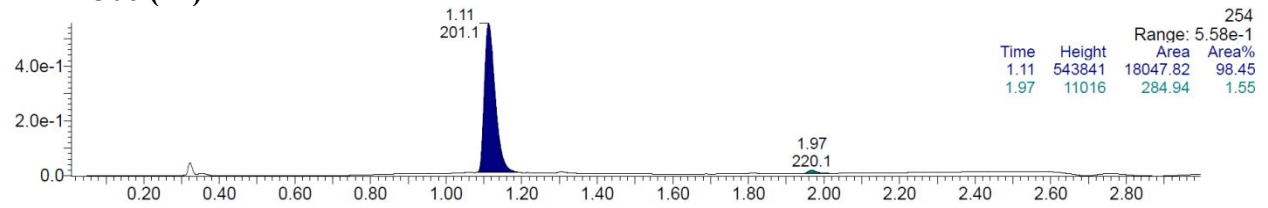

Supplement: jm3c02308_si_001.pdf [file jm3c02308_si_001.pdf]
